# Supplementary material for: The Parkinson Disease gene SNCA: Evolutionary and structural insights with pathological implication
Source: PubMed Central journal article supplement (PMC4832246; doi:10.1038/srep24475), 2016-04-15
Supplement: srep24475-s1.pdf [file srep24475-s1.pdf]

# **The Parkinson Disease gene SNCA: Evolutionary and structural insights with pathological implication**

**Irum Javaid Siddiqui, NashaimanPervaiz and Amir Ali Abbasi\***

National Center for Bioinformatics, Program of Comparative and Evolutionary Genomics,  
Faculty of Biological Sciences, Quaid-i-Azam University, Islamabad 45320, Pakistan.

\*Corresponding author

E-mail: [abbasiam@qau.edu.pk](mailto:abbasiam@qau.edu.pk)

Tel Office: [+92-51-90644109](tel:+92-51-90644109)

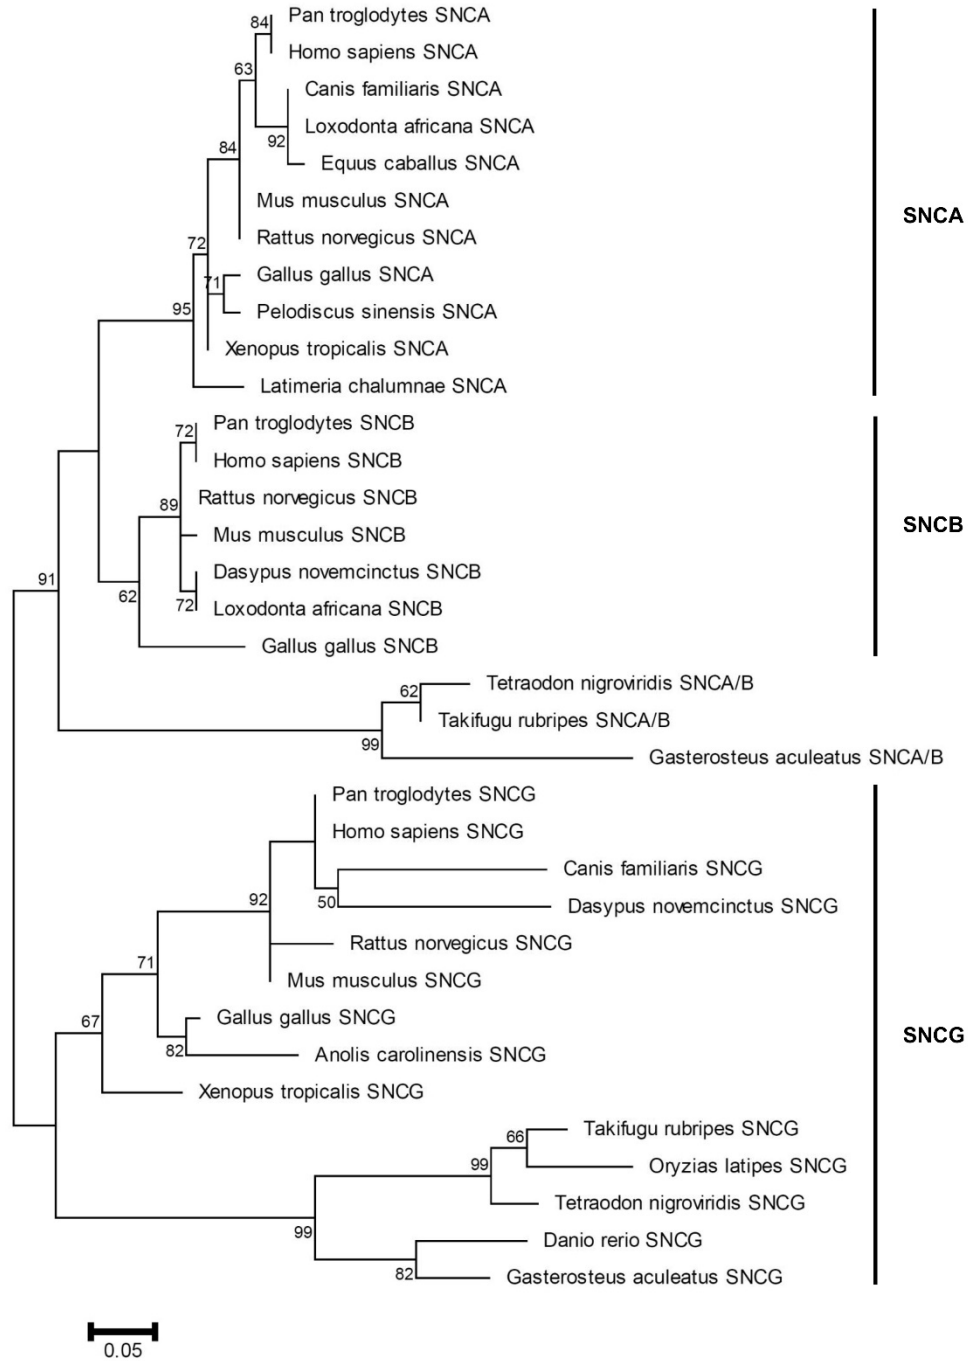

**Figure S1.** The evolutionary history was inferred by using the ML method based on the WAG model. The tree with the highest log likelihood (-1290.8345) is shown. The percentage of trees in which the associated taxa clustered together is shown next to the branches; only the values  $\geq 50\%$  are shown here. A discrete Gamma distribution was used to model evolutionary rate differences among sites (+G, parameter = 2.1877). The tree is drawn to scale, with branch lengths measured in the number of substitutions per site. The analysis involved 35 amino acid sequences. All positions containing gaps and missing data were eliminated. There were a total of 79 positions in the final dataset.

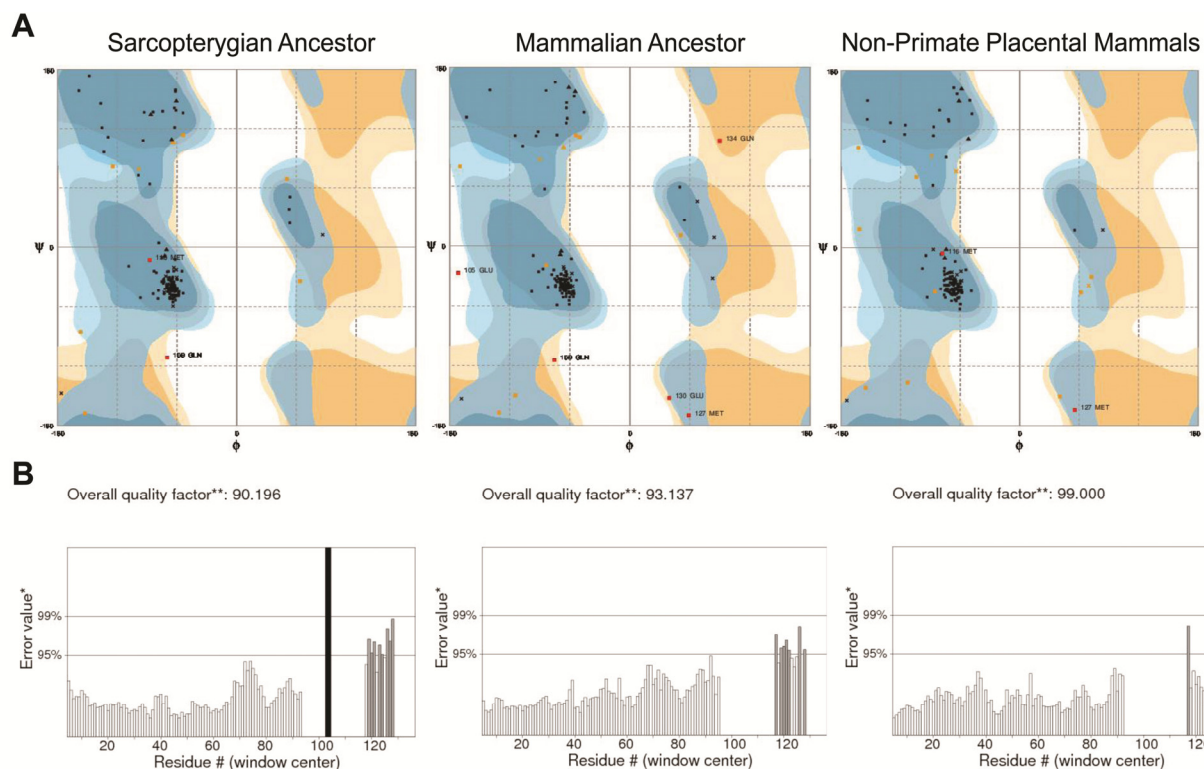

**Figure S2. Evaluation of 3D models of SNCA proteins.** (A) Ramachandran plots of sarcopterygian ancestral, mammalian ancestral and non-primate placental mammals specific SNCA proteins. (B) Quality of models have been examined with the help of Errat. Overall quality factor is expressed as percentage of the protein for which the calculated error value falls below the 95% rejection limit, calculated by Errat.

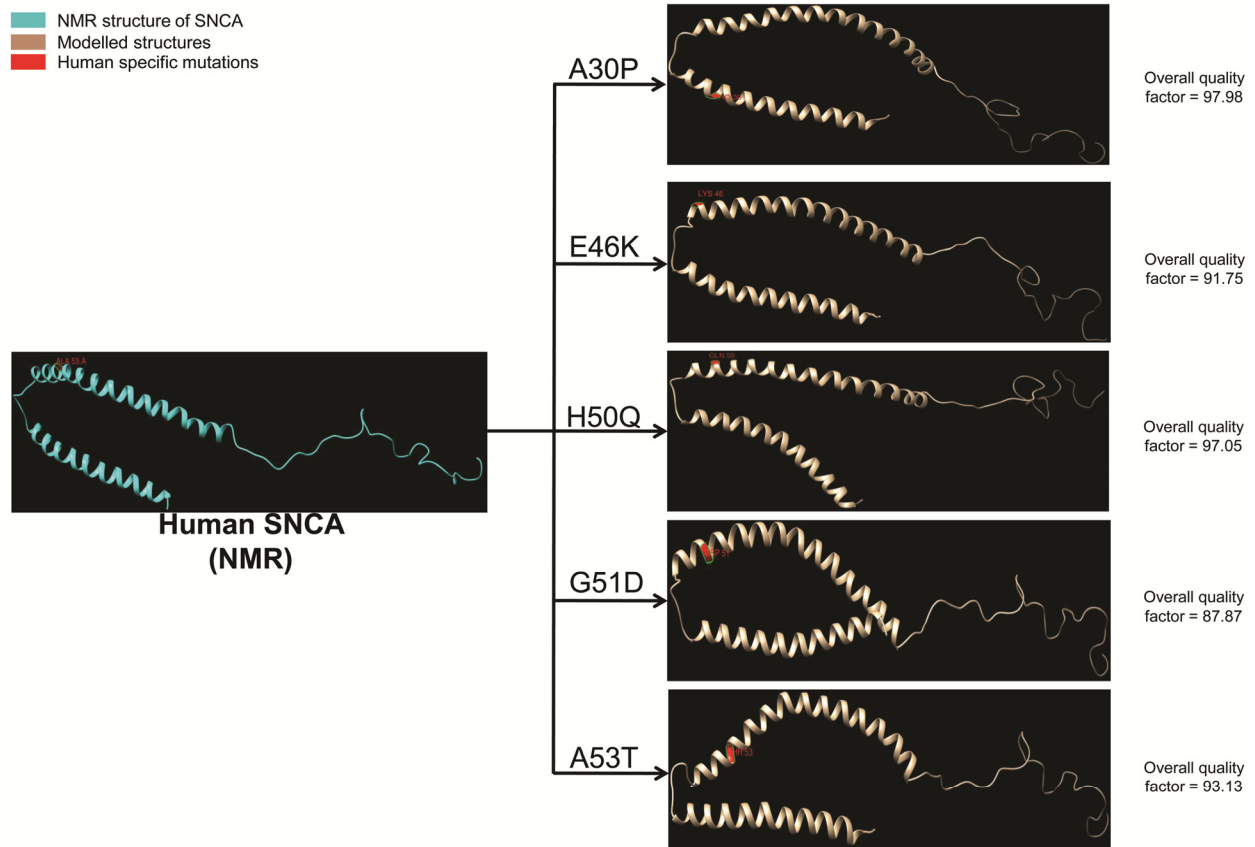

**Figure S3. Structural analysis of mutant models of human SNCA generated from Modeller.** Human specific mutations involved in FPD are red color coded. NMR structure of SNCA was obtained from PDB (1XQ8). Overall quality factor is expressed as percentage of the protein for which the calculated error value falls below the 95% rejection limit, calculated by Errat.

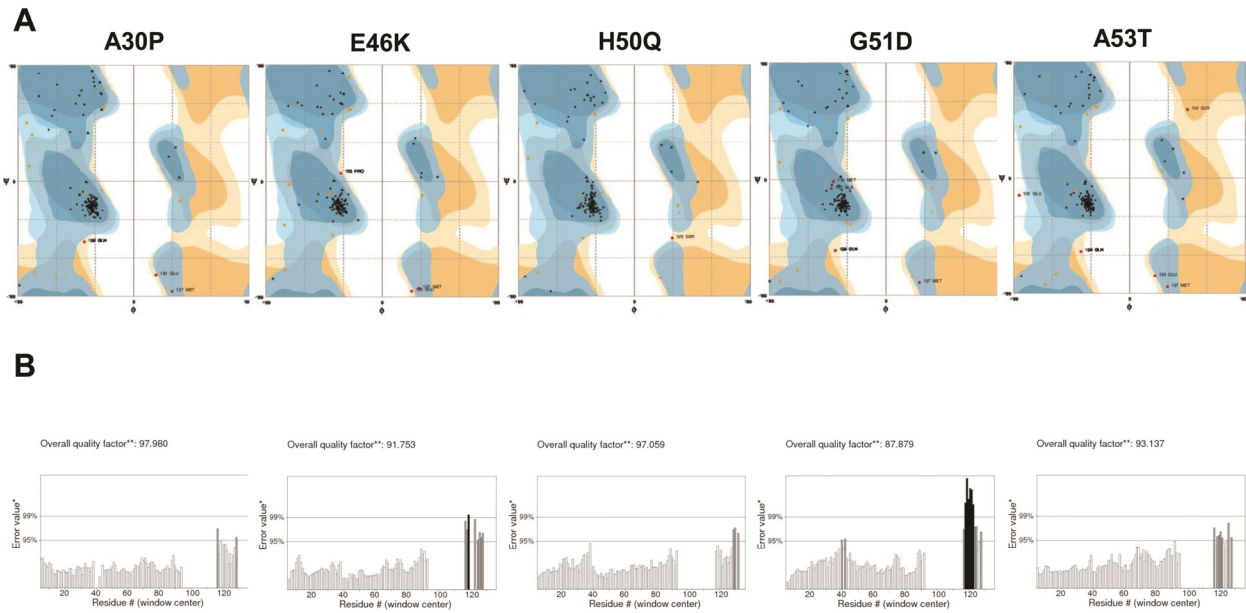

**Figure S4. Evaluation of 3D models of mutant SNCA proteins. (A)** Ramachandran plots of human specific SNCA mutations involved in FPD. **(B)** Quality of models have been examined with the help of Errat. Overall quality factor is expressed as percentage of the protein for which the calculated error value falls below the 95% rejection limit, calculated by Errat.

A

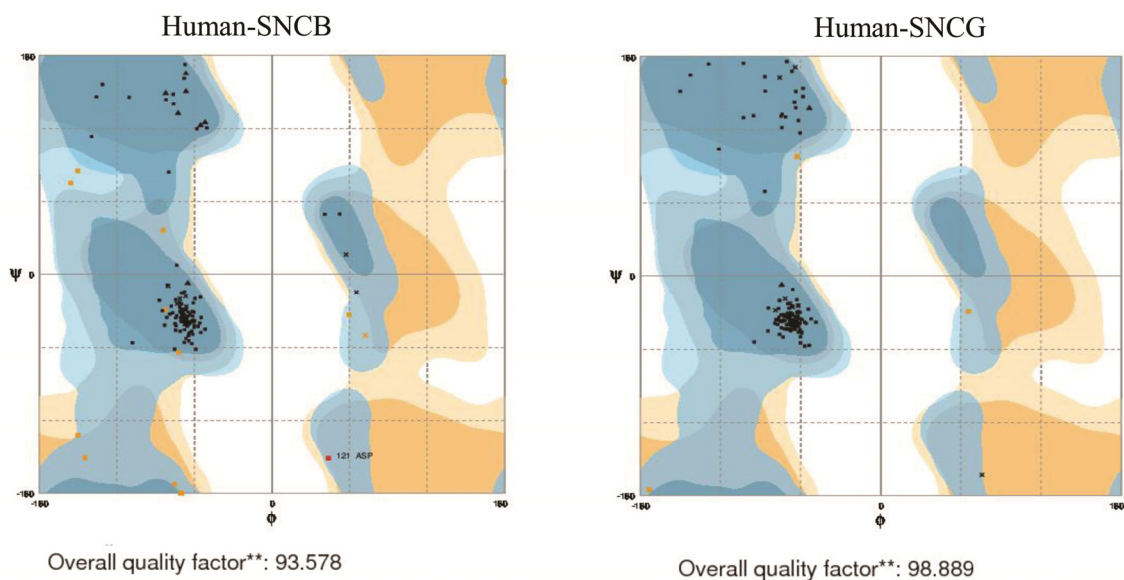

B

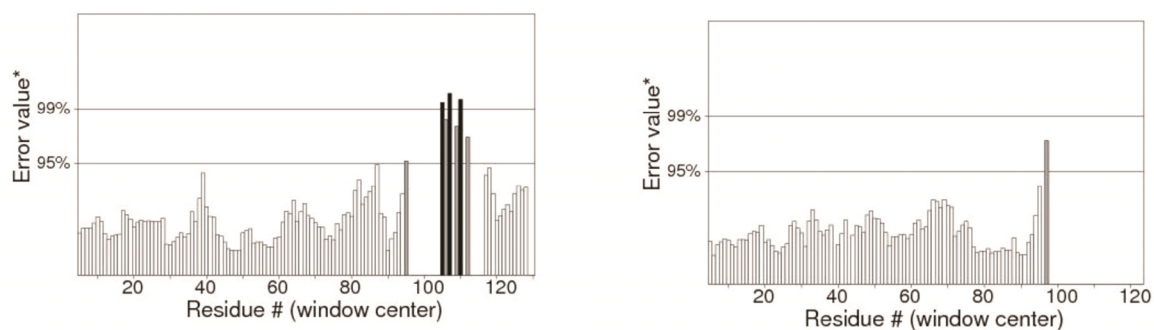

**Figure S5. Evaluation of 3D models of human SNCB and human SNCG.** (A) Ramachandran plots of human paralogous sequences, SNCB and SNCG. (B) Quality of models have been examined with the help of Errat. Overall quality factor is expressed as percentage of the protein for which the calculated error value falls below the 95% rejection limit, calculated by Errat.

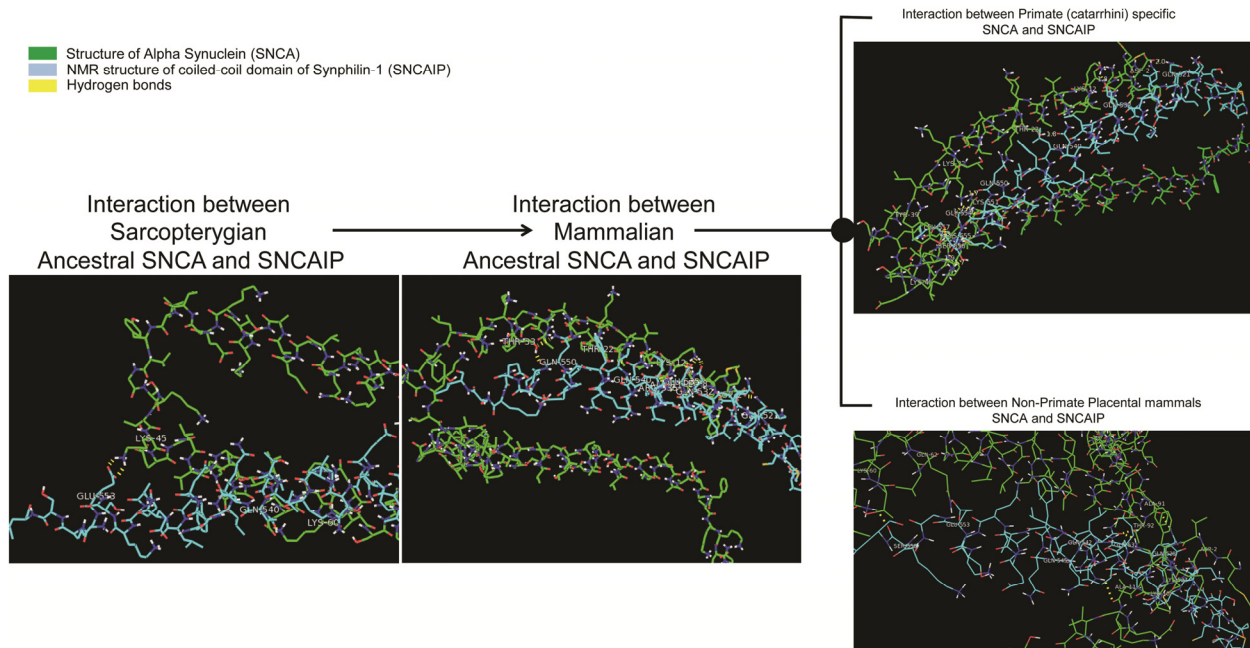

**Figure S6. Analysis of the evolution of interactions between the ancestral SNCA proteins and coiled-coil domain of SNCAIP.** Diagram displaying interactions between the sarcopterygian ancestral, mammalian ancestral, non-primate placental mammals specific and catarrhini's specific SNCA proteins and coiled-coil domain (510-557) of SNCAIP (2KES). SNCA proteins and SNCAIP interacting partner are color coded. Interacting residues are highlighted in white color. Hydrogen bonding is represented as dotted line in yellow.

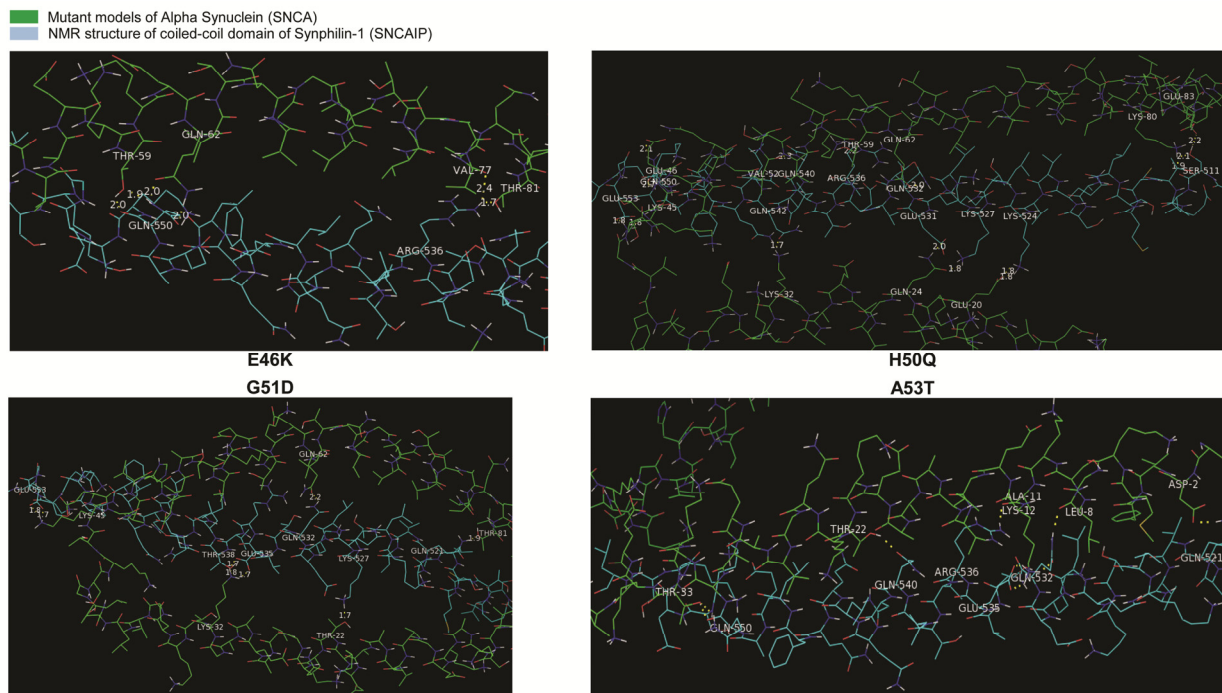

**Figure S7. Analysis of the interacting residues involved in hydrogen bonding between the docked complexes of mutant models of SNCA and coiled-coil domain of SNCAIP.** Diagrammatic view of the interactions between the mutant models of SNCA and coiled-coil domain (510-557) of SNCAIP (2KES). Mutant SNCA proteins and SNCAIP interacting partner are color coded. Interacting residues are highlighted in white color. Hydrogen bonding is represented as dotted line in yellow.



**Table S1.** Estimation of number of synonymous substitutions per synonymous site (dS), number of non-synonymous substitutions per non-synonymous site (dN) with the respective strength of the sequence (dN/dS) with Hyphy.

|                                                                                                   | dN/dS(dN,dS)               | dN-dS <sup>1</sup> |
|---------------------------------------------------------------------------------------------------|----------------------------|--------------------|
| <b>Substitution Model/Method →<br/>Species-SNCA ↓</b>                                             | <b>Codon Based (GY-94)</b> |                    |
| <b>Hominoids</b>                                                                                  |                            |                    |
| Human                                                                                             | 1 (1e-10,1e-10)            | -0.05              |
| Chimpanzee                                                                                        | 1 (1e-10,1e-10)            |                    |
| Gorilla                                                                                           | 4 e-09 (1e-10,0.020)       |                    |
| Orangutan                                                                                         | 3 e-09 (1 e-10,0.031)      |                    |
| <b>Non-Hominoids</b>                                                                              |                            |                    |
| Macaque                                                                                           | 0.2 (0.02,0.097)           | -1.969             |
| Marmoset                                                                                          | 0.08 (0.008,0.095)         |                    |
| Squirrel Monkey                                                                                   | 0.02 (0.017,0.842)         |                    |
| Bushbaby                                                                                          | 0.05 (0.057,1.037)         |                    |
| <b>Non-Primate Placental Mammals</b>                                                              |                            |                    |
| Mouse                                                                                             | 0.02 (0.07,3.3)            | -5.01              |
| Dog                                                                                               | 0.05 (0.02,0.36)           |                    |
| Cow                                                                                               | 0.04 (0.03,0.68)           |                    |
| Elephant                                                                                          | 0.01 (0.01,0.8)            |                    |
| <b>Non-Mammalian Tetrapods</b>                                                                    |                            |                    |
| Chicken                                                                                           | 0.03 (0.06,1.62)           | -24.55             |
| Turtle                                                                                            | 0.4 (0.12,0.28)            |                    |
| Frog                                                                                              | 0.01 (0.13,8.91)           |                    |
| Coelacanth                                                                                        | 0.01 (0.26,14.31)          |                    |
| <sup>1</sup> dN-dS<0 implies negative selection constraint on SNCA within sarcopterygian lineage. |                            |                    |

**Table S2.** Estimation of number of synonymous substitutions per synonymous site (dS), number of non-synonymous substitutions per non-synonymous site (dN) with the respective strength of the sequence (dN/dS) with Hyphy.

|                                                                                                   | dN/dS(dN,dS)               | dN-dS <sup>1</sup> |
|---------------------------------------------------------------------------------------------------|----------------------------|--------------------|
| <b>Substitution Model/Method →<br/>Species-SNCB ↓</b>                                             | <b>Codon Based (GY-94)</b> |                    |
| <b>Hominoids</b>                                                                                  |                            |                    |
| Human                                                                                             | 0.07 (0.0014,0.018)        | -0.04              |
| Chimpanzee                                                                                        | 1 (1e-010,1e-010)          |                    |
| Gorilla                                                                                           | 0.05 (0.001,0.018)         |                    |
| Orangutan                                                                                         | 0.07 (0.0007,0.009)        |                    |
| <b>Non-Hominoids</b>                                                                              |                            |                    |
| Macaque                                                                                           | 0.04 (0.006,0.133)         | -1.40              |
| Marmoset                                                                                          | 0.35 (0.007,0.141)         |                    |
| Squirrel Monkey                                                                                   | 0.05 (0.002,0.04)          |                    |
| Bushbaby                                                                                          | 0.04 (0.05,1.47)           |                    |
| <b>Non-Primate Placental Mammals</b>                                                              |                            |                    |
| Mouse                                                                                             | 0.13 (0.148,1.07)          | -5.66              |
| Dog                                                                                               | 0.61 (0.02,0.18)           |                    |
| Cow                                                                                               | 0.12 (0.06,0.47)           |                    |
| Elephant                                                                                          | 0.13 (0.66,4.83)           |                    |
| <b>Non-Mammalian Tetrapods</b>                                                                    |                            |                    |
| Chicken                                                                                           | 0.05 (0.13,2.30)           | -9.60              |
| Turtle                                                                                            | 0.05 (0.13,2.44)           |                    |
| Frog                                                                                              | 0.05 (0.10,1.82)           |                    |
| Coelacanth                                                                                        | 0.05 (0.20,3.61)           |                    |
| <sup>1</sup> dN-dS<0 implies negative selection constraint on SNCB within sarcopterygian lineage. |                            |                    |

**Table S3.** Estimation of number of synonymous substitutions per synonymous site (dS), number of non-synonymous substitutions per non-synonymous site (dN) with the respective strength of the sequence (dN/dS) with Hyphy.

|                                                       | dN/dS(dN,dS)               | dN-dS <sup>1</sup> |
|-------------------------------------------------------|----------------------------|--------------------|
| <b>Substitution Model/Method →<br/>Species-SNCG ↓</b> | <b>Codon Based (GY-94)</b> |                    |
| <b>Hominoids</b>                                      |                            |                    |
| Human                                                 | 0.83 (0.005,0.006)         | -0.01              |
| Chimpanzee                                            | 1 (1e-010,1e-010)          |                    |
| Gorilla                                               | 0.8 (0.01,0.0125)          |                    |
| Orangutan                                             | 0.86 (0.038,0.044)         |                    |
| <b>Non-Hominoids</b>                                  |                            |                    |
| Macaque                                               | 0.2 (0.033,0.159)          | -1.40              |
| Marmoset                                              | 0.19 (0.015,0.076)         |                    |
| Squirrel Monkey                                       | 0.2 (0.05,0.24)            |                    |
| Bushbaby                                              | 0.2 (0.27,1.29)            |                    |
| <b>Non-Primate Placental Mammals</b>                  |                            |                    |
| Mouse                                                 | 0.15 (0.223,1.478)         | -4.82              |
| Dog                                                   | 0.15 (0.254,1.687)         |                    |
| Cow                                                   | 0.15 (0.131,0.869)         |                    |
| Elephant                                              | 0.15 (0.248,1.647)         |                    |
| <b>Non-Mammalian Tetrapods</b>                        |                            |                    |
| Chicken                                               | 0.11 (0.378,3.425)         | -22.21             |
| Turtle                                                | 0.11 (0.085,0.77)          |                    |
| Frog                                                  | 0.11 (0.428,3.88)          |                    |
| Coelacanth                                            | 0.11 (1.866,16.9)          |                    |
| <b>Fishes</b>                                         |                            |                    |
| Fugu                                                  | 0.18 (0.164,0.87)          | -1.92              |
| Tetraodon                                             | 0.18 (0.03,0.162)          |                    |
| Stickleback                                           | 0.18 (0.143,0.76)          |                    |
| Medaka                                                | 0.18 (0.11,0.58)           |                    |

<sup>1</sup>dN-dS<0 implies negative selection constraint on SNCG within sarcopterygian lineage.

**Table S4.** Identification of negatively constrained sites in SNCA among sarcopterygians at 0.1 significance level with Hyphy.

| <b>Index</b> | <b>Residue no</b> | <b>dN-dS</b> | <b>P-value</b> |
|--------------|-------------------|--------------|----------------|
| 1            | 12                | -2.860705    | 0.06           |
| 2            | 13                | -2.860572    | 0.06           |
| 3            | 15                | -3           | 0.03           |
| 4            | 18                | -4           | 0.01           |
| 5            | 20                | -4.272426    | 0.01           |
| 6            | 23                | -7.122523    | 0.0009         |
| 7            | 30                | -3           | 0.03           |
| 8            | 37                | -5           | 0.004          |
| 9            | 39                | -4.83201     | 0.02           |
| 10           | 41                | -3           | 0.03           |
| 11           | 46                | -2.848435    | 0.06           |
| 12           | 47                | -4           | 0.01           |
| 13           | 49                | -4           | 0.01           |
| 14           | 50                | -4.177328    | 0.05           |
| 15           | 52                | -3           | 0.03           |
| 16           | 62                | -4.282012    | 0.01           |
| 17           | 65                | -4.83201     | 0.01           |
| 18           | 67                | -5           | 0.004          |
| 19           | 69                | -6           | 0.001          |
| 20           | 72                | -4           | 0.01           |
| 21           | 73                | -5           | 0.004          |
| 22           | 75                | -3           | 0.03           |
| 23           | 77                | -4           | 0.01           |
| 24           | 78                | -4           | 0.01           |
| 25           | 83                | -2.854275    | 0.06           |
| 26           | 85                | -3           | 0.03           |
| 27           | 86                | -3           | 0.03           |
| 28           | 88                | -2.894755    | 0.05           |
| 29           | 94                | -3.150189    | 0.07           |
| 30           | 98                | -7.248015    | 0.002          |

*Abbreviations:* dS, synonymous substitutions per synonymous site; dN, non-synonymous substitutions per non-synonymous site. 4th column depicts p-value (p<0.1) suggesting putative negatively constrained sites.

**Table S5:** Analysis of the interacting residues involved in hydrogen bonding between the clades specific docked complexes of SNCA and coiled-coil domain of SNCAIP.

| <b>Docked complex</b>                                    | <b>Binding energy (kcal/mol)</b> | <b>Interacting residues of SNCA</b> | <b>Interacting residues of SNCAIP</b> | <b>Hydrogen Bonding (Å)</b> |
|----------------------------------------------------------|----------------------------------|-------------------------------------|---------------------------------------|-----------------------------|
| <b>Primates (Catarrhini) SNCA-SNCAIP complex</b>         | -805.8                           | Asp2 <sup>a</sup>                   | Gln521                                | 2                           |
|                                                          |                                  | Lys12 <sup>a</sup>                  | Gln532                                | 1.8                         |
|                                                          |                                  | Thr22 <sup>a</sup>                  | Gln540                                | 1.8                         |
|                                                          |                                  | Lys32 <sup>b</sup>                  | Gln550                                | 1.7                         |
|                                                          |                                  | Lys32 <sup>b</sup>                  | Lys551                                | 2.4                         |
|                                                          |                                  | Lys32 <sup>b</sup>                  | Gly554                                | 1.7                         |
|                                                          |                                  | Tyr39 <sup>b</sup>                  | Leu557                                | 2.3                         |
|                                                          |                                  | Lys45 <sup>b</sup>                  | Lys555                                | 1.9                         |
|                                                          |                                  | Lys45 <sup>b</sup>                  | Ser556                                | 1.7                         |
| <b>Non-primate placental mammals SNCA-SNCAIP complex</b> | -779.4                           | Asp2                                | Lys527                                | 1.7                         |
|                                                          |                                  | Lys10                               | Gln542                                | 1.7                         |
|                                                          |                                  | Ala11                               | Gln545                                | 2.6                         |
|                                                          |                                  | Lys60                               | Ser556                                | 1.7                         |
|                                                          |                                  | Gly62                               | Glu553                                | 2                           |
|                                                          |                                  | Ala91                               | Gln528                                | 2                           |
|                                                          |                                  | Thr92                               | Gln532                                | 2                           |
| <b>Mammalian Ancestral SNCA-SNCAIP complex</b>           | -767.9                           | Asp2 <sup>a</sup>                   | Gln521                                | 2.1                         |
|                                                          |                                  | Leu8                                | Gln532                                | 2                           |
|                                                          |                                  | Ala11                               | Arg536                                | 1.8                         |
|                                                          |                                  | Lys12                               | Glu535                                | 1.7                         |
|                                                          |                                  | Lys12                               | Glu535                                | 1.8                         |
|                                                          |                                  | Lys12 <sup>a</sup>                  | Gln532                                | 1.7                         |
|                                                          |                                  | Thr22 <sup>a</sup>                  | Gln540                                | 1.9                         |
|                                                          |                                  | Thr33                               | Gln550                                | 2.2                         |
|                                                          |                                  | Lys45                               | Glu553                                | 1.8                         |
| <b>Sarcopterygian Ancestral SNCA-SNCAIP complex</b>      | -722.5                           | Lys45                               | Glu553                                | 1.8                         |
|                                                          |                                  | Lys60                               | Gln540                                | 1.9                         |
|                                                          |                                  | Lys60                               | Gln540                                | 1.9                         |

This table depicts interactions between the ancestral SNCA proteins and coiled-coil domain (510-557) of SNCAIP (2KES). 2<sup>nd</sup> column depicts the lowest binding energies of the docked complexes in kcal/mol. 4<sup>th</sup> column represents hydrogen bonding between the hydrogen bond donor and hydrogen bond acceptor (Å) in docked complexes.

<sup>a</sup>Interactions conserved between mammalian ancestor and catarrhines.

<sup>b</sup>Interactions that transpired specific to catarrhines.

**Table S6:** Analysis of the interacting residues involved in hydrogen bonding between the docked complexes of mutant models of SNCA and coiled-coil domain of SNCAIP.

| <b>Docked Complex</b>      | <b>Binding energy (kcal/mol)</b> | <b>Interacting residues of SNCA</b> | <b>Interacting residues of SNCAIP</b> | <b>Hydrogen Bonding (Å)</b> |
|----------------------------|----------------------------------|-------------------------------------|---------------------------------------|-----------------------------|
| <b>A30P-SNCAIP complex</b> | -744.8                           | Thr81                               | Gln532                                | 2.5                         |
|                            |                                  | Thr81                               | Arg536                                | 1.7                         |
|                            |                                  | Thr81                               | Arg536                                | 2.1                         |
|                            |                                  | Gly84                               | Gln540                                | 2.3                         |
|                            |                                  | Ser87                               | Gln540                                | 2                           |
|                            |                                  | Thr92                               | Gln542                                | 2.1                         |
|                            |                                  | Val95                               | Gln550                                | 2.2                         |
|                            |                                  | Lys97                               | Glu553                                | 1.6                         |
|                            |                                  | Lys97                               | Gln550                                | 1.8                         |
| <b>E46K-SNCAIP complex</b> | -779.1                           | Thr59                               | Gln550                                | 2                           |
|                            |                                  | Thr59                               | Gln550                                | 1.9                         |
|                            |                                  | Gln62                               | Gln550                                | 2                           |
|                            |                                  | Gln62                               | Gln550                                | 2                           |
|                            |                                  | Val77                               | Arg536                                | 2.4                         |
|                            |                                  | Thr81                               | Arg536                                | 1.7                         |
| <b>H50Q-SNCAIP complex</b> | -703.2                           | Glu20                               | Lys524                                | 1.8                         |
|                            |                                  | Glu20                               | Lys524                                | 1.8                         |
|                            |                                  | Gln24                               | Lys527                                | 1.8                         |
|                            |                                  | Gln24                               | Glu531                                | 2                           |
|                            |                                  | Lys32                               | Gln542                                | 1.7                         |
|                            |                                  | Lys45                               | Gln553                                | 1.8                         |
|                            |                                  | Lys45                               | Glu553                                | 1.8                         |
|                            |                                  | Glu46                               | Gln550                                | 2.1                         |
|                            |                                  | Glu46                               | Gln550                                | 2.7                         |
|                            |                                  | Val52                               | Gln540                                | 2.3                         |
|                            |                                  | Thr59                               | Arg536                                | 2.2                         |
|                            |                                  | Gln62                               | Gln532                                | 2                           |
|                            |                                  | Lys80                               | Ser511                                | 1.9                         |
|                            |                                  | Lys80                               | Ser511                                | 1.9                         |
|                            |                                  | Glu83                               | Ser511                                | 2.2                         |
|                            |                                  | Lys32                               | Glu535                                | 1.7                         |
| Lys32                      | Glu535                           | 1.7                                 |                                       |                             |
| Lys32                      | Thr538                           | 1.8                                 |                                       |                             |

|                                                                                                                                                                                                                                                                                                                                                                                                   |        |       |        |     |
|---------------------------------------------------------------------------------------------------------------------------------------------------------------------------------------------------------------------------------------------------------------------------------------------------------------------------------------------------------------------------------------------------|--------|-------|--------|-----|
|                                                                                                                                                                                                                                                                                                                                                                                                   |        | Lys45 | Glu553 | 1.7 |
|                                                                                                                                                                                                                                                                                                                                                                                                   |        | Lys45 | Glu553 | 1.8 |
|                                                                                                                                                                                                                                                                                                                                                                                                   |        | Gln62 | Gln532 | 2.2 |
|                                                                                                                                                                                                                                                                                                                                                                                                   |        | Thr81 | Gln521 | 1.9 |
| <b>A53T-SNCAIP<br/>complex</b>                                                                                                                                                                                                                                                                                                                                                                    | -767.9 | Asp2  | Gln521 | 2.1 |
|                                                                                                                                                                                                                                                                                                                                                                                                   |        | Leu8  | Gln532 | 2   |
|                                                                                                                                                                                                                                                                                                                                                                                                   |        | Ala11 | Arg536 | 1.8 |
|                                                                                                                                                                                                                                                                                                                                                                                                   |        | Lys12 | Gln532 | 1.7 |
|                                                                                                                                                                                                                                                                                                                                                                                                   |        | Lys12 | Glu535 | 1.7 |
|                                                                                                                                                                                                                                                                                                                                                                                                   |        | Lys12 | Glu535 | 1.8 |
|                                                                                                                                                                                                                                                                                                                                                                                                   |        | Thr22 | Gln540 | 1.9 |
|                                                                                                                                                                                                                                                                                                                                                                                                   |        | Thr33 | Gln550 | 2.2 |
|                                                                                                                                                                                                                                                                                                                                                                                                   |        | Thr33 | Gln550 | 1.9 |
|                                                                                                                                                                                                                                                                                                                                                                                                   |        | Thr33 | Gln550 | 1.9 |
| <p>This table depicts interactions (in terms of hydrogen bonding) between mutant models of SNCA proteins and the coiled-coil domain of SNCAIP (510-557). 2<sup>nd</sup> column depicts the lowest binding energies of the docked complexes in kcal/mol. 4<sup>th</sup> column represents hydrogen bonding between the hydrogen bond donor and hydrogen bond acceptor (Å) in docked complexes.</p> |        |       |        |     |
